# Supplementary material for: Dendritic polyglycerol-conjugated gold nanostars with different densities of functional groups to regulate osteogenesis in human mesenchymal stem cells
Source: Royal Society of Chemistry journal article supplement (doi:10.1039/d0nr06570f), 2020-01-01
Supplement: d0nr06570f1.pdf [file d0nr06570f1.pdf]

## Electronic Supplementary Information

### **Dendritic polyglycerol-conjugated gold nanostars with different densities of functional groups to regulate osteogenesis from human mesenchymal stem cells**

Suqiong Zhou,<sup>‡a</sup> Yuanwei Pan,<sup>‡a</sup> Jianguang Zhang,<sup>a</sup> Yan Li,<sup>a</sup> Falko Neumann,<sup>a</sup> Tanja Schwerdtle,<sup>b</sup> Wenzhong Li<sup>\*a</sup> and Rainer Haag<sup>\*a</sup>

<sup>a</sup> Institute of Chemistry and Biochemistry, Freie Universität Berlin, Takustrasse 3, Berlin, 14195, Germany.

E-mail: wenzhong.li@fu-berlin.de, haag@chemie.fu-berlin.de

<sup>b</sup> Institute of Nutritional Science, Department of Food Chemistry, University of Potsdam, Arthur-Scheunert-Allee 114-116, Nuthetal, 14558, Germany

<sup>‡</sup> These authors contributed equally to this work.

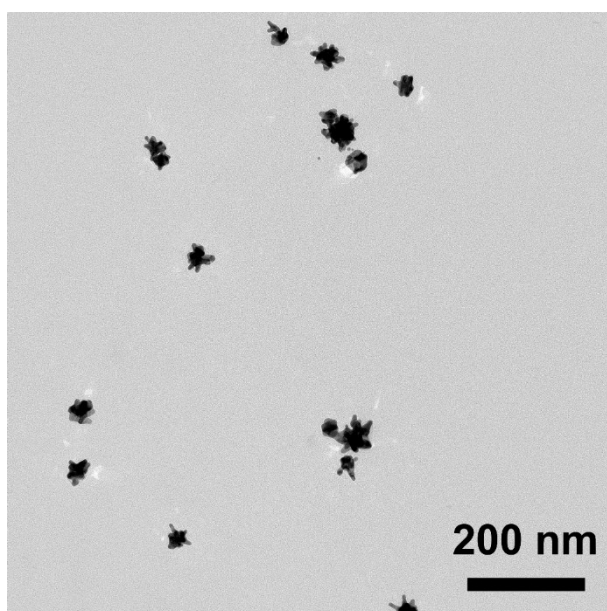

**Fig. S1** The low-magnification TEM image of GNSs.

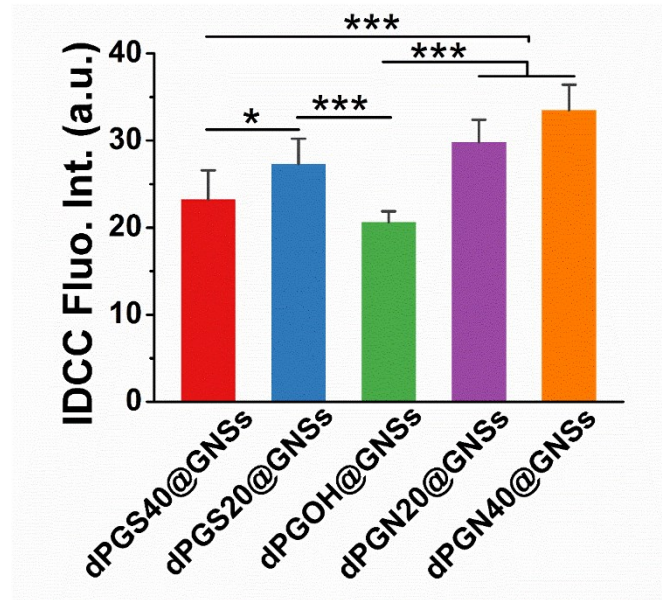

**Fig. S2** The corresponding fluorescence intensity of IDCC in MSCs quantified from the CLSM images.
